# Supplementary material for: Local Autoantigen Expression as Essential Gatekeeper of Memory T-Cell Recruitment to Islet Grafts in Diabetic Hosts
Source: PubMed Central journal article supplement — Diabetes. 2013 Feb 14;62(3):905–11. doi: 10.2337/db12-0600 (PMC3581210; doi:10.2337/db12-0600), 2013-02-14

SUPPLEMENTARY DATA

**Supplementary Figure 1.** Recruitment of IGRP<sub>206-214</sub><sup>-</sup> and Insulin B<sub>15-23</sub>-reactive CD8<sup>+</sup> T-cells from diabetic IGRP<sub>206-214</sub>-competent or -deficient NOD hosts into islet grafts from IGRP<sub>206-214</sub>-competent or -deficient donors or NOD.*rag2*<sup>-/-</sup>.IGRP<sub>K209A/F213A</sub><sup>K1/K1</sup> donors. (A) IFN $\gamma$  secretion by islet graft-associated CD8<sup>+</sup> T-cells in response to IGRP<sub>206-214</sub> peptide-pulsed NOD DCs. Data correspond, from left to right, to 5, 4, 3 and 3 grafts per group, respectively. (B) IFN $\gamma$  secretion by islet graft-associated CD8<sup>+</sup> T-cells in response to InsB<sub>15-23</sub> peptide-pulsed NOD DCs. Data correspond, from left to right, to 5, 3, 4 and 3 grafts per group, respectively. (C) Examples of FACS staining profiles of graft-associated CD8<sup>+</sup> T-cells containing low versus high percentages of InsB<sub>15-23</sub>/K<sup>d</sup> tetramer-reactive cells.

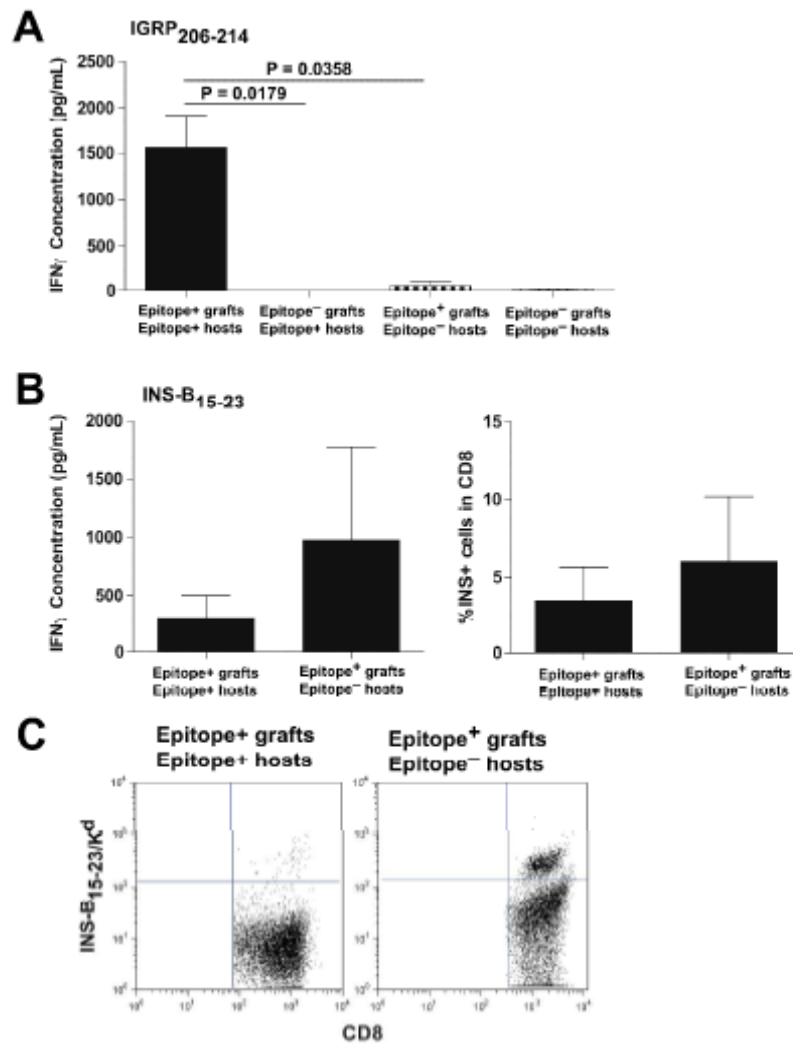

Supplement: supp_db12-0600_DB120600SupplementaryData.pdf [file supp_db12-0600_DB120600SupplementaryData.pdf]
